# Supplementary material
Source: PubMed Central journal article supplement (PMC8092063)
Supplement: CJN.12480720SupplementaryData.pdf [file CJN.12480720SupplementaryData.pdf]

**Supplemental Table 1: Fried Criteria**

| <b><u>Measure</u></b> | <b><u>Test</u></b>                                                                                                                                                                                                | <b><u>Scoring</u></b>                                                                                                                                                                                                                                                                                              |
|-----------------------|-------------------------------------------------------------------------------------------------------------------------------------------------------------------------------------------------------------------|--------------------------------------------------------------------------------------------------------------------------------------------------------------------------------------------------------------------------------------------------------------------------------------------------------------------|
| Slowness              | 4 m gait speed                                                                                                                                                                                                    | 0: speed $\geq$ 0.8 m/s<br>1: speed $<$ 0.8 m/s                                                                                                                                                                                                                                                                    |
| Weakness              | Handgrip strength using a Jamar Hydraulic Dynamometer (Model J00105, LaFayette Instrument Company Inc.).                                                                                                          | 0: strength $>$ 30 kg (males)<br>strength $>$ 20 kg (females)<br>1: strength $\leq$ 30 kg (males)<br>strength $\leq$ 20 kg (females)                                                                                                                                                                               |
| Weight loss           | Have you lost weight in the last 12 months unintentionally not due to diet or exercise?<br><br>If yes, how much weight have you lost in the last 12 months (kilograms)?                                           | 0: weight loss $\leq$ 10 lbs<br>1: weight loss $>$ 10 lbs                                                                                                                                                                                                                                                          |
| Low physical activity | Physical Activity Scale for the Elderly (PASE) and Paffenbarger Physical Activity Index <sup>19</sup>                                                                                                             | 0: Paffenbarger Physical Activity Index $\geq$ 383 kcal kcal/week (males)<br>Paffenbarger Physical Activity Index $\geq$ 270 kcal kcal/week (females)<br>1: Paffenbarger Physical Activity Index kcal/week $<$ 383 kcal kcal/week (males)<br>Paffenbarger Physical Activity Index $<$ 270 kcal kcal/week (females) |
| Exhaustion            | Center for Epidemiologic Studies Depression (CES-D) scale: "How often in the last week did you feel that everything was an effort?" and "How often in the last week did you feel that you could not "get going"?" | 0: Did not answer "Occasionally" or "Most or all of time" to either question.<br>1: Answered "Occasionally" or "Most or all of time" to at least one of the questions.                                                                                                                                             |

**Supplemental Table 2: Short Physical Performance Battery Scoring**

| Test                                                                                                                                                                                                                                                                             |                                                                                                                                                                                             | Scoring |                    | Total    |
|----------------------------------------------------------------------------------------------------------------------------------------------------------------------------------------------------------------------------------------------------------------------------------|---------------------------------------------------------------------------------------------------------------------------------------------------------------------------------------------|---------|--------------------|----------|
| Chair stand test                                                                                                                                                                                                                                                                 | The time taken for the participant to rise from sitting in a chair 5 times is measured. The test is completed without using hands on the chair or other tools to help the participant stand | 0       | Unable or >60s     | 4 points |
|                                                                                                                                                                                                                                                                                  |                                                                                                                                                                                             | 1       | ≥16.70s            |          |
|                                                                                                                                                                                                                                                                                  |                                                                                                                                                                                             | 2       | 13.70-16.69s       |          |
|                                                                                                                                                                                                                                                                                  |                                                                                                                                                                                             | 3       | 11.20-13.69 s      |          |
|                                                                                                                                                                                                                                                                                  |                                                                                                                                                                                             | 4       | ≤11.19 s           |          |
| Balance tests                                                                                                                                                                                                                                                                    | Side by side: the participant is asked to stand with both feet side by side and the time is measured.                                                                                       | 0       | Unable or <10 s    | 4 points |
|                                                                                                                                                                                                                                                                                  |                                                                                                                                                                                             | 1       | ≥10s               |          |
|                                                                                                                                                                                                                                                                                  | Semi-tandem: the participant is asked to stand with one foot slightly more in front of the other and the time is measured.                                                                  | 0       | Unable or <10 s    |          |
|                                                                                                                                                                                                                                                                                  |                                                                                                                                                                                             | 1       | ≥10s               |          |
|                                                                                                                                                                                                                                                                                  | Tandem: the participant is asked to stand with one foot in front of the other and the time is measured.                                                                                     | 0       | Unable or <3s      |          |
|                                                                                                                                                                                                                                                                                  |                                                                                                                                                                                             | 1       | 3.00-9.99s         |          |
| 2                                                                                                                                                                                                                                                                                | ≥10s                                                                                                                                                                                        |         |                    |          |
| 4 m gait speed test                                                                                                                                                                                                                                                              | The time taken for the participant to walk 4 m is measured twice. The average time of the two trials is used to calculate score; Use of a mobility aid in the test was recorded.            | 0       | Unable to complete | 4 points |
|                                                                                                                                                                                                                                                                                  |                                                                                                                                                                                             | 1       | >8.70s             |          |
|                                                                                                                                                                                                                                                                                  |                                                                                                                                                                                             | 2       | 6.21-8.70s         |          |
|                                                                                                                                                                                                                                                                                  |                                                                                                                                                                                             | 3       | 4.82-6.20s         |          |
|                                                                                                                                                                                                                                                                                  |                                                                                                                                                                                             | 4       | <4.82s             |          |
| The SPPB is scored from 0 to 4 in 3 sections for a maximum score of 12 and a minimum score of 0. Scores were grouped by normal physical function and frail: score >10 (normal physical function) and score ≤10 (reduced physical function as measure of frailty) <sup>18</sup> . |                                                                                                                                                                                             |         |                    |          |

**Supplemental Table 3: Number of deaths before and after dialysis initiation based on objective and subjective measures of frailty and physical function**

| <b>Measure</b>                        | <b>Death Before Dialysis Initiation<br/>N=156</b> | <b>Death After Dialysis Initiation<br/>N=70</b> |
|---------------------------------------|---------------------------------------------------|-------------------------------------------------|
| Fried                                 |                                                   |                                                 |
| Frail                                 | 77 (50.6%)                                        | 38 (54.3%)                                      |
| Non Frail                             | 79 (49.4%)                                        | 32 (45.7%)                                      |
| Short Physical<br>Performance Battery |                                                   |                                                 |
| Frail                                 | 117 (75.0%)                                       | 48 (68.6%)                                      |
| Non Frail                             | 39 (25.0%)                                        | 22 (31.4%)                                      |
| Physician Impression                  |                                                   |                                                 |
| Frail                                 | 96 (61.5%)                                        | 37 (52.9%)                                      |
| Non Frail                             | 60 (38.5%)                                        | 33 (47.1%)                                      |
| Nurse Impression                      |                                                   |                                                 |
| Frail                                 | 75 (48.1%)                                        | 37 (52.9%)                                      |
| Non Frail                             | 81 (51.9%)                                        | 33 (47.1%)                                      |

**Supplemental Table 4: Associations of Fried components with dialysis choice and all-cause mortality**

| Fried Component <sup>a</sup> | Death (N=226) |                           |                                      | Dialysis choice (In-Center = 155, Home = 72) <sup>c,d</sup> |                           |                                      |
|------------------------------|---------------|---------------------------|--------------------------------------|-------------------------------------------------------------|---------------------------|--------------------------------------|
|                              | N (%)         | Unadjusted HR<br>(95% CI) | Adjusted <sup>b</sup> HR<br>(95% CI) | N (%)                                                       | Unadjusted OR<br>(95% CI) | Adjusted <sup>b</sup> OR<br>(95% CI) |
| <b>Slowness</b>              |               |                           |                                      |                                                             |                           |                                      |
| Present                      | 114 (50)      | 2.94 (2.26-3.82)          | 1.99 (1.49-2.65)                     | 48 (31)                                                     | 1.86 (0.95-3.65)          | 1.48 (0.70-3.15)                     |
| Not present                  | 112 (50)      | 1 (reference)             | 1 (reference)                        | 107 (69)                                                    | 1 (reference)             | 1 (reference)                        |
| <b>Weakness</b>              |               |                           |                                      |                                                             |                           |                                      |
| Present                      | 145 (64)      | 2.32 (1.77-3.05)          | 1.61 (1.20-2.18)                     | 76 (49)                                                     | 1.81 (1.01-3.22)          | 1.52 (0.82-2.83)                     |
| Not present                  | 81 (36)       | 1 (reference)             | 1 (reference)                        | 79 (51)                                                     | 1 (reference)             | 1 (reference)                        |
| <b>Exhaustion</b>            |               |                           |                                      |                                                             |                           |                                      |
| Present                      | 96 (42)       | 1.33 (1.02-1.74)          | 1.42 (1.08-1.85)                     | 72 (46)                                                     | 1.45 (0.82-2.56)          | 1.39 (0.77-2.50)                     |
| Not present                  | 130 (58)      | 1 (reference)             | 1 (reference)                        | 83 (54)                                                     | 1 (reference)             | 1 (reference)                        |
| <b>Low Physical Activity</b> |               |                           |                                      |                                                             |                           |                                      |
| Present                      | 155 (69)      | 1.57 (1.18-2.07)          | 1.22 (0.91-1.62)                     | 108 (70)                                                    | 2.31 (1.29-4.11)          | 2.15 (1.19-3.86)                     |
| Not present                  | 71 (31)       | 1 (reference)             | 1 (reference)                        | 47 (30)                                                     | 1 (reference)             | 1 (reference)                        |
| <b>Weight Loss</b>           |               |                           |                                      |                                                             |                           |                                      |
| Present                      | 41 (18)       | 1.40 (0.98-2.01)          | 1.33 (0.91-1.93)                     | 27 (17)                                                     | 1.59 (0.68-3.68)          | 1.52 (0.82-2.83)                     |
| Not present                  | 185 (82)      | 1 (reference)             | 1 (reference)                        | 128 (83)                                                    | 1 (reference)             | 1 (reference)                        |

Abbreviations: HR, Hazard Ratio; OR, Odds Ratio; CI, Confidence Interval

<sup>a</sup>All exposures in models were categorical

<sup>b</sup>Models adjusted for age, sex, and comorbidity count.

<sup>c</sup>Analysis was performed in participants who initiated dialysis for kidney failure.

<sup>d</sup>OR refers to odds of choosing in-center dialysis

**Supplemental Table 5: Association of Short Physical Performance Battery components with dialysis choice and all-cause mortality**

|                          | Death (226)        | Dialysis Choice<br>(In-Center = 155, Home = 72) <sup>c,d</sup> |
|--------------------------|--------------------|----------------------------------------------------------------|
| <b>Model<sup>a</sup></b> | <b>HR (95% CI)</b> | <b>OR (95% CI)</b>                                             |
| Chair Stand Unadjusted   | 3.61 (2.35-5.57)   | 2.85 (1.55-5.27)                                               |
| Chair Stand Adjusted*    | 2.52 (1.61-3.94)   | 2.61 (1.35-5.09)                                               |
| Gait Unadjusted          | 2.79 (2.15-3.62)   | 2.09 (1.08-4.03)                                               |
| Gait Adjusted*           | 1.82 (1.36-2.43)   | 1.71 (0.82-3.59)                                               |
| Balance Unadjusted       | 2.47 (1.89-3.23)   | 1.47 (0.81-2.68)                                               |
| Balance Adjusted*        | 1.85 (1.39-2.46)   | 1.31 (0.69-2.48)                                               |

Abbreviations: HR, Hazard Ratio; OR, Odds Ratio; CI, Confidence Interval

<sup>a</sup>All exposures were modelled as continuous variables with a range of 0-4 according to SPPB cut-offs(21).

<sup>b</sup>Models adjusted for age, sex, and comorbidity count.

<sup>c</sup>Analysis was performed in participants who initiated dialysis for kidney failure.

<sup>d</sup>OR refers to odds of choosing facility based dialysis

**Supplemental Figure 1: Distribution of likert scale responses from physician and nurse impressions of frailty**

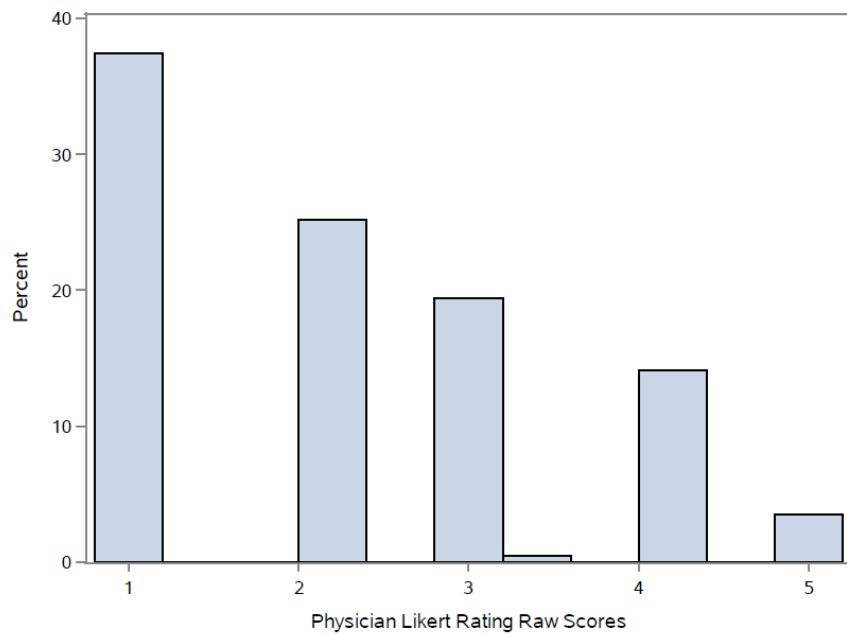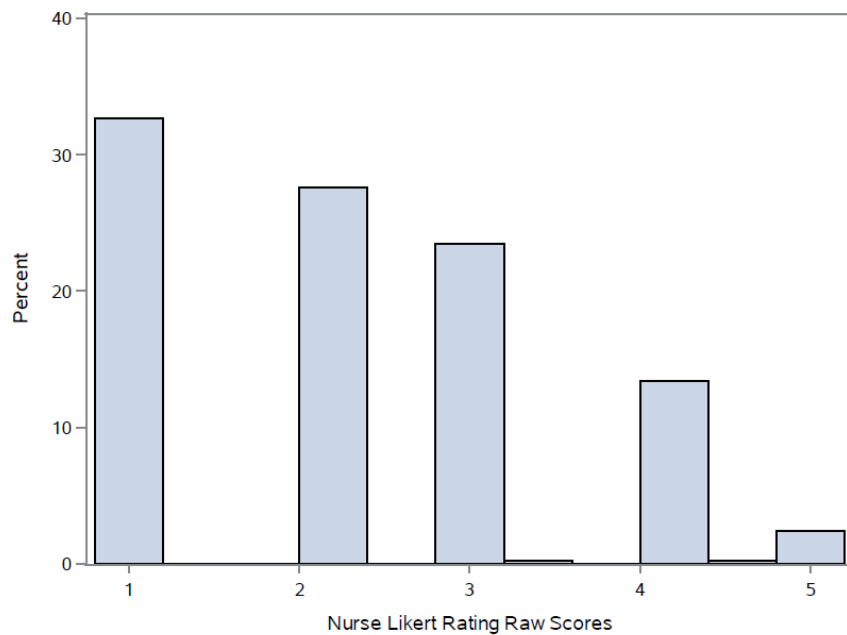

Supplemental Figure 1. Y-axis represents the percentage of responses corresponding to the Likert scale. X-axis represents the responses. Physicians and nurses were asked "On a scale from 1 to 5, 1 being very fit and 5 being very frail, where would you rate the participant?" Respondents were able to provide scores that were non-whole numbers.
